# Supplementary material for: Gene-specific regulation of hepatic selenoprotein expression by interleukin-6
Source: Royal Society of Chemistry journal article supplement (doi:10.1039/c5mt00211g), 2015-01-01
Supplement: c5mt00211g1.pdf [file c5mt00211g1.pdf]

**Supplementary Table S1:** Primer sequences for promoter amplification from human cDNA

| Gene name | Primer sequence (5' → 3')                             |
|-----------|-------------------------------------------------------|
| hSEPP1    | fwd AGATATGGGACCCCAAAGG<br>rev AGTCCTGTTGTTTACCTCACC  |
| hDIO1     | fwd CCGCCTCTGGACTTCATTTA<br>rev CTCGGCAAAGCCAGAGTAAG  |
| hGPX2     | fwd TTAGCAGATGTCCTGCGATG<br>rev CCCACCTGTAAGTGCTGTT   |
| hGPX4     | fwd AAGAAAACCCTCCAGACTTGTG<br>rev AGAGCGCTCATTGGTCAGA |

**Supplementary Table S2:** Primer sequences qRT-PCR

| Gene name | Primer sequence (5' → 3')                                 |
|-----------|-----------------------------------------------------------|
| hHPRT     | fwd TGACACTGGGAAAACAATGCA<br>rev GGCCTTTTCACCAGCAAGCT     |
| hCP       | fwd ACGGCCATAGCTTCCAATACAA<br>rev AGTTGTATGCTTCCAGTCTTCT  |
| hSEPP1    | fwd TATGATAGATGTGGCCGTCTTG<br>rev TGTGATGATGCTCATCATGGTA  |
| hSELS     | fwd CTGCGCTTCCTGCACACCAC<br>rev CATCAGGTTCCACAGCAGCCG     |
| hDIO1     | fwd GGTGCAACATTTGGGAGTTTAT<br>rev TGGTGATTTTCTGATCTCCATGT |
| hGPX1     | fwd GGGCAAGGTACTACTTATCGAG<br>rev TTCAGAATCTCTTCGTTCTTGG  |
| hGPX2     | fwd CCAATTTGGACATCAGGAGAA<br>rev CTCAAAGTTCCAGGCCACAT     |
| hGPX4     | fwd GCTGTGGAAGTGGATGAAGA<br>rev CTAGAAATAGTGGGGCAGGTC     |

**Supplementary Table S3:** qRT-PCR results (average C<sub>t</sub>-values)

| Gene name | control | IL-6 |
|-----------|---------|------|
| hHPRT     | 23.9    | 23.8 |
| hCP       | 18.7    | 16.6 |
| hSEPP1    | 15.0    | 16.0 |
| hSELS     | 22.1    | 21.8 |
| hDIO1     | 23.2    | 25.0 |
| hGPX1     | 27.8    | 27.4 |
| hGPX2     | 18.9    | 17.9 |
| hGPX4     | 18.4    | 19.4 |
